# Supplementary material for: Impaired labyrinth formation prevents the establishment of the maternal-fetal interface in conditional Hand1-deficient mice
Source: bioRxiv or medRxiv preprint supplement (doi:10.1101/2020.09.02.280354), 2020-09-02
Supplement: Supplementary file [file media-1.pdf]

Table S1.

| <b>Genotyping Primers</b>        | <b>Forward</b>                       | <b>Reverse</b>                        |
|----------------------------------|--------------------------------------|---------------------------------------|
| Hand1 275-448                    | 5'-<br>GCCCAAACGAAAAGGCTCAG-3'       | 5'-AGCACGTCCATCAAGTAGGC-<br>3'        |
| Sry                              | 5'-<br>AACAACTGGGCTTTGCACATTG-<br>3' | 5'-<br>GTTTATCAGGGTTTCTCTCTAGC-<br>3' |
| Nifa                             | 5'-<br>TGCTGTGTTCTGGTCAGTCAAG-<br>3' | 5'-<br>CAAAGCAAATCTCCATGCTCGG-<br>3'  |
|                                  |                                      |                                       |
| <b>qPCR Primers</b>              | <b>Forward</b>                       | <b>Reverse</b>                        |
| Angiopoietin 1                   |                                      |                                       |
| Angiopoietin 2                   |                                      |                                       |
| VegFa                            |                                      |                                       |
| Plgf                             |                                      |                                       |
|                                  |                                      |                                       |
| <b>Antibodies for IHC and IF</b> | <b>Source</b>                        | <b>Concentration/Incubation</b>       |
| Hand1                            | R&D Systems AF3168                   | 1:100                                 |
| CD-31                            | R&D Systems AF3628                   | 1:100                                 |
| CD-31                            | Abcam ab28364                        | 1:100                                 |
| Cytokeratin-7                    | Abcam ab199718                       | 1:800                                 |
